# Supplementary material for: Characteristics of COVID-19 Inpatients in Rehabilitation Units during the First Pandemic Wave: A Cohort Study from a Large Hospital in Champagne Region
Source: MDPI journal article supplement (doi:10.3390/biology11060937), 2022-06-20
Supplement: s1 [file s1]

Supplementary Table S1 : Characteristics of patients according to discharge destination : Home versus post acute care unit

| Characteristic                                     | Home<br>N=233 | PRM + PRU<br>N=111 | <i>p value</i> |
|----------------------------------------------------|---------------|--------------------|----------------|
| Women ( <i>n</i> , %)                              | 120 (51.5%)   | 50 (45%)           | 0.263          |
| Age, years ( <i>median</i> , [Q1-Q3])              | 67 [53-79]    | 76 [69-84]         | < 0.001        |
| BMI Kg/m <sup>2</sup> ‡ ( <i>median</i> , [Q1-Q3]) | 29 [25-32]    | 26 [23-30]         | 0.002          |
| BMI ≥ 30 Kg/m <sup>2</sup> ‡ ( <i>n</i> , %)       | 13 (5.6%)     | 4 (3.6%)           | 0.298          |
| Current smokers * ( <i>n</i> , %)                  | 14 (6.0%)     | 4 (3.6%)           | 0.267          |
| Arterial hypertension ( <i>n</i> , %)              | 117 (50.2%)   | 67 (60.4%)         | 0.553          |
| Diabetes ( <i>n</i> , %)                           | 54 (23.2%)    | 32 (28.8%)         | 0.630          |
| Chronic respiratory disease ( <i>n</i> , %)        | 40 (17.2%)    | 24 (21.6%)         | 0.652          |
| Renal failure requiring RRT ( <i>n</i> , %)        | 14 (6.0%)     | 7 (6.3%)           | 0.859          |
| Charlson score ( <i>médiane</i> , [Q1-Q3])         | 1 [0-2]       | 2 [0-3]            | 0.055          |
| At risk of severe form of disease ( <i>n</i> , %)  | 194 (83.3%)   | 105 (94.6%)        | 0.004          |

PRM = Physical and Rehabilitation; PRU = polyvalent rehabilitation unit ; BMI = body mass index ; Q, quartile (Q1 = 25<sup>th</sup> percentile, Q3 = 75<sup>th</sup> percentile) ; RRT, renal replacement therapy.

‡ 82 missing data, \* 40 missing data.

Supplementary Table S2: Clinical presentation, biology results and treatment of patients according to discharge destination : home versus post acute care unit

|                                                             | Home (A) |            | PRM + PRU |             | <i>p value</i> |
|-------------------------------------------------------------|----------|------------|-----------|-------------|----------------|
|                                                             | N=233    |            | N=111     |             |                |
| <b><i>Clinical presentation</i></b>                         |          |            |           |             |                |
| Severe clinical presentation ( <i>n, %</i> )                | 60       | (25.8%)    | 35        | (31.5%)     | 0.262          |
| Early warning score <sup>†</sup> ( <i>median, [Q1-Q3]</i> ) | 6        | [3-8]      | 7         | [4-9]       | 0.008          |
| Oxygen therapy at admission ( <i>n, %</i> )                 | 89       | (38.2%)    | 55        | (49.6%)     | 0.035          |
| Breathing rate ( <i>median, [Q1-Q3]</i> )                   | 22       | [18-26]    | 20        | [18-28]     | 0.764          |
| Pulmonary embolism ( <i>n, %</i> )                          | 10       | (4.3%)     | 7         | (6.3%)      | 0.436          |
| <b><i>Biology during acute infection</i></b>                |          |            |           |             |                |
| Leukocytes, G/L ( <i>median, [Q1-Q3]</i> )                  | 6.9      | [4.9-9]    | 6.1       | [4.2-8.9]   | 0.192          |
| Lymphocytes <1.5 G/L ( <i>n, %</i> )                        | 179      | (76.8%)    | 88        | (79.3%)     | 0.196          |
| GFR < 60 ml/min/kg ( <i>n, %</i> )                          | 56       | (24%)      | 42        | (37.8%)     | 0.009          |
| Albuminemia, g/L <sup>‡</sup> ( <i>median, [Q1-Q3]</i> )    | 35       | [31-38]    | 32        | [29-36]     | 0.004          |
| CRP, mg/L ( <i>median, [Q1-Q3]</i> )                        | 61,6     | [22.5-120] | 67        | [20.5-146]  | 0.752          |
| Troponin, ng/L <sup>§</sup> ( <i>median, [Q1-Q3]</i> )      | 13,8     | [6.2-34.8] | 21.8      | [14.2-37.7] | < 0.001        |
| <b><i>Treatments</i></b>                                    |          |            |           |             |                |
| Need for ICU admission ( <i>n, %</i> )                      | 29       | (12.4%)    | 36        | (32.4%)     | < 0.001        |
| Antibiotic therapy ( <i>n, %</i> )                          | 217      | (93.1%)    | 107       | (96.4%)     | 0.227          |
| Corticosteroid therapy ( <i>n, %</i> )                      | 122      | (52.4%)    | 68        | (61.3%)     | 0.131          |
| Anticoagulant therapy ( <i>n, %</i> )                       | 219      | (94.0%)    | 107       | (96.4%)     | 0.349          |
| Length of stay, days ( <i>median, [Q1-Q3]</i> )             | 8        | [5-14]     | 16        | [10-29,5]   | < 0.001        |

PRM = Physical and Rehabilitation ; PRU = polyvalent rehabilitation unit ; Q, quartile (Q1 = 25<sup>th</sup> percentile, Q3 = 75<sup>th</sup> percentile) ; GFR, glomerular filtration rate ; CRP, C-reactive protein ; ICU, intensive care unit.

† 35 missing data, ‡ 39 missing data, § 75 not applicable
